# Supplementary material for: Diet and Survival in Black Women With Epithelial Ovarian Cancer
Source: PubMed Central journal article supplement (PMC11581655; doi:10.1001/jamanetworkopen.2024.40279), 2024-10-18
Supplement: jamanetwopen-e2440279-s002.pdf [file jamanetwopen-e2440279-s002.pdf]

## Data Sharing Statement

Armidie. Diet and Survival in Black Women With Epithelial Ovarian Cancer. *JAMA Netw Open*. Published online October 18, 2024. doi:10.1001/jamanetworkopen.2024.40279

### Data

**Data available:** Yes

**Data types:** Deidentified participant data, Data dictionary

**How to access data:** De-identified data and data dictionary for this current study is available upon reasonable request, in accordance with NIH data sharing policy. Inquiries can be directed to: [aces@emory.edu](mailto:aces@emory.edu)

**When available:** With publication

### Supporting Documents

**Document types:** None

### Additional Information

**Who can access the data:** Researchers whose proposed use of the data has been approved

**Types of analyses:** For research purposes.

**Mechanisms of data availability:** After approval of a proposal, and with a signed data access agreement.
